# Initiation of Resuscitation with High Tidal Volumes Causes Cerebral Hemodynamic Disturbance, Brain Inflammation and Injury in Preterm Lambs

Graeme R. Polglase<sup>1,2\*</sup>, Suzanne L. Miller<sup>1,2</sup>, Samantha K. Barton<sup>1</sup>, Ana A. Baburamani<sup>1</sup>, Flora Y. Wong<sup>1</sup>, James D. S. Aridas<sup>1</sup>, Andrew W. Gill<sup>3</sup>, Timothy J. M. Moss<sup>1,2</sup>, Mary Tolcos<sup>1</sup>, Martin Kluckow<sup>4,9</sup>, Stuart B. Hooper<sup>1,2,9</sup>

**1** The Ritchie Centre, Monash Institute of Medical Research, Monash University, Clayton, Victoria, Australia, **2** Department of Obstetrics and Gynecology, Monash University, Clayton, Victoria, Australia, **3** Centre for Neonatal Research and Education, School of Women's and Infants' Health, The University of Western Australia, Crawley, Western Australia, Australia, **4** Department of Neonatal Medicine, Royal North Shore Hospital and University of Sydney, Sydney, New South Wales, Australia

## Abstract

**Aims:** Preterm infants can be inadvertently exposed to high tidal volumes ( $V_T$ ) in the delivery room, causing lung inflammation and injury, but little is known about their effects on the brain. The aim of this study was to compare an initial 15 min of high  $V_T$  resuscitation strategy to a less injurious resuscitation strategy on cerebral haemodynamics, inflammation and injury.

**Methods:** Preterm lambs at 126 d gestation were surgically instrumented prior to receiving resuscitation with either: 1) High  $V_T$  targeting 10–12 mL/kg for the first 15 min ( $n=6$ ) or 2) a protective resuscitation strategy (Prot  $V_T$ ), consisting of prophylactic surfactant, a 20 s sustained inflation and a lower initial  $V_T$  (7 mL/kg;  $n=6$ ). Both groups were subsequently ventilated with a  $V_T$  7 mL/kg. Blood gases, arterial pressures and carotid blood flows were recorded. Cerebral blood volume and oxygenation were assessed using near infrared spectroscopy. The brain was collected for biochemical and histologic assessment of inflammation, injury, vascular extravasation, hemorrhage and oxidative injury. Unventilated controls (UVC;  $n=6$ ) were used for comparison.

**Results:** High  $V_T$  lambs had worse oxygenation and required greater ventilatory support than Prot  $V_T$  lambs. High  $V_T$  resulted in cerebral haemodynamic instability during the initial 15 min, adverse cerebral tissue oxygenation index and cerebral vasoparalysis. While both resuscitation strategies increased lung and brain inflammation and oxidative stress, High  $V_T$  resuscitation significantly amplified the effect ( $p=0.014$  and  $p<0.001$ ). Vascular extravasation was evident in the brains of 60% of High  $V_T$  lambs, but not in UVC or Prot  $V_T$  lambs.

**Conclusion:** High  $V_T$  resulted in greater cerebral haemodynamic instability, increased brain inflammation, oxidative stress and vascular extravasation than a Prot  $V_T$  strategy. The initiation of resuscitation targeting Prot  $V_T$  may reduce the severity of brain injury in preterm neonates.

**Citation:** Polglase GR, Miller SL, Barton SK, Baburamani AA, Wong FY, et al. (2012) Initiation of Resuscitation with High Tidal Volumes Causes Cerebral Hemodynamic Disturbance, Brain Inflammation and Injury in Preterm Lambs. PLoS ONE 7(6): e39535. doi:10.1371/journal.pone.0039535

**Editor:** Irwin Reiss, Erasmus University Rotterdam, The Netherlands

**Received:** February 29, 2012; **Accepted:** May 23, 2012; **Published:** June 22, 2012

**Copyright:** © 2012 Polglase et al. This is an open-access article distributed under the terms of the Creative Commons Attribution License, which permits unrestricted use, distribution, and reproduction in any medium, provided the original author and source are credited.

**Funding:** This research was supported by the Cerebral Palsy Alliance of Australia, North Shore Heart Research Foundation, NH&MRC Research Fellowships (GRP: 1026890) and SBH: 545921) and the Victorian Government's Operational Infrastructure Support Program. The funders had no role in study design, data collection and analysis, decision to publish, or preparation of the manuscript.

**Competing Interests:** The authors have declared that no competing interests exist.

\* E-mail: graeme.polglase@monash.edu

<sup>9</sup> These authors contributed equally to this work.

## Introduction

Brain injury, particularly white matter injury and intracranial hemorrhage, is a major problem in very premature infants and the incidence and severity increases with decreasing gestational age and birth weight [1]. In addition to immaturity of the brain at the time of preterm birth, these babies may be exposed to systemic pathogenic factors such as infection/inflammation (both ante- and post-natal) and disturbed cerebral blood flow [2,3,4]. In the immediate newborn period, resuscitation, mechanical ventilation,

poor ventricular function, rapid volume expansion and a patent ductus arteriosus are strongly associated with cerebral pathology in immature newborns [2], suggesting that early respiratory and cardiovascular care of preterm infants may critically influence the immature brain and the progression towards brain injury.

Recent clinical trials find that many preterm infants are inadvertently exposed to high tidal volumes ( $V_T$ ) during the initial resuscitation in the delivery room [5,6]. The initiation of resuscitation is usually provided manually and the delivered  $V_T$  is poorly controlled and not routinely measured [7]. However, the

initiation of respiratory support after birth, particularly with high  $V_T$ , can induce an inflammatory response leading to chronic diseases of the lung such as bronchopulmonary dysplasia [8,9].

We, and others, have shown that resuscitation with high  $V_T$  for 15 min initiates a pulmonary inflammatory response [10,11,12], which increases systemic proinflammatory cytokine mRNA expression [13,14,15]. Further, the initiation of ventilation with high airway pressures destabilizes the cardiopulmonary transition by increasing pulmonary vascular resistance, decreasing pulmonary blood flow, re-establishing right-to-left shunting through the ductus arteriosus and ultimately reducing left ventricular output [16]. These cardiovascular disturbances may underlie the pathogenesis of brain injury [17], acting via a reduction in cerebral blood flow indicated by reduced superior vena cava flow. Low SVC flow in the first 24 h after birth in preterm infants (<28 weeks), is strongly associated with IVH and long-term neurodevelopmental disability [18,19]. We have recently shown that cerebral haemodynamics were most affected by resuscitation within the first 15 min [20], coinciding with the major events of the cardiopulmonary transition at birth [21].

Given that the initial resuscitation of the preterm neonate, particularly with the use of high  $V_T$ , can result in a pulmonary and systemic inflammatory response and cause cardiopulmonary haemodynamic instability and hypoxia, we aimed to investigate the effects of resuscitation on the preterm brain. Specifically, we compared cerebral haemodynamic and brain histology using two different resuscitation strategies, one using high  $V_T$  and therefore considered injurious, versus a protective package of care, consisting of prophylactic surfactant, a sustained inflation followed by low  $V_T$  resuscitation, designed to optimize transition with minimal barotrauma.

## Materials and Methods

### Ethics Statement

The experimental protocol was performed in accordance with guidelines established by the National Health and Medical Research Council of Australia and was approved by the Monash Medical Centre (MMCA) animal ethics committee at Monash University.

### Instrumentation and Delivery

At  $126 \pm 2$  d (mean  $\pm$  SD), the ewe and fetus were anesthetized (2% Isoflurane in oxygen, Bomac Animal Health, NSW, Australia) and the fetal head and neck were exposed *via* cesarean section. A skin incision was made in the fetal neck for placement of ultrasonic flow transducers (3 mm; Transonic Systems, Ithaca, NY) around the left and right carotid arteries. Carotid blood flow correlates highly with cerebral blood flow [22]. A polyvinyl catheter was placed into the left jugular vein. The fetal trachea was intubated with a cuffed endotracheal tube (4.0 mm) and lung liquid was drained passively. A transcutaneous oximeter (Masimo, Irvine, CA) was attached around the right forelimb before the umbilical cord was clamped and cut. Lambs were delivered, dried, weighed, placed under a radiant heater and resuscitation initiated (see below). Polyvinyl catheters were placed into an umbilical artery to measure mean arterial pressure. All lambs received sedation (Alfaxane i.v. 5–15 mg/kg/h; Jurox, East Tamaki, Auckland, New Zealand) in 5% dextrose to minimize spontaneous breathing during the experiment via the umbilical vein catheter. Left and right carotid arterial blood flows (CABF) were recorded continuously (Powerlab; ADInstruments, Castle Hill, NSW, Australia), along with mean arterial pressure (DTX Plus Transducer; Becton Dickinson, Singapore), from before delivery until the end of the

experiment. Unventilated controls (UVC;  $n = 6$ ) at the same age were delivered via caesarean section and immediately killed (sodium pentobarbitone:  $>100$  mg/kg i.v.) without undergoing surgery or postnatal anaesthesia. Ewes were similarly humanely killed after delivery of the lambs.

### Resuscitation Strategy

Lambs were randomly assigned to receive either of two strategies that, based on previous studies, would be expected to either cause lung injury (High  $V_T$  group;  $n = 6$ ) or to protect the lung from injury (Prot  $V_T$  group;  $n = 6$ ). These were: 1) High  $V_T$ , targeting a volume of 12–15 mL/kg within the first postnatal breaths using a neonatal positive pressure ventilator (Babylog 8000+, Dräger, Lübeck, Germany), which was maintained for 15 minutes to mirror the time taken for clinical neonatal resuscitation and transfer to NICU [23]; or 2) Prot  $V_T$ , consisting of prophylactic surfactant (100 mg/kg, Curosurf<sup>®</sup>, Chiesi Pharma, Italy) followed by a 20 second sustained inflation delivered by a Neopuff (Fisher & Paykel Healthcare, Panmure, Auckland, New Zealand) using a peak inspiratory pressure (PIP) of 35 cmH<sub>2</sub>O. This second package of care was chosen to minimize pulmonary and systemic inflammation and improve the cardiopulmonary circulatory transition at birth [24,25,26,27]. After the sustained inflation in the Prot  $V_T$  group and after 15 min of ventilation in High  $V_T$  group, all lambs were ventilated in volume guarantee mode ( $V_T$  7 mL/kg; PEEP, 5 cmH<sub>2</sub>O; inspiratory time, 0.3 s; and expiratory time, 0.6 s) for the remainder of the experiment. The high  $V_T$  group did not receive surfactant. The total ventilation time for both groups was 90 minutes. In all lambs, ventilation was conducted using warmed, humidified air with the fraction of inspired oxygen initially set at 0.4 but adjusted to maintain arterial oxygen saturation (SaO<sub>2</sub>) between 88–95%. Well-being of the newborn lamb was monitored by regular blood gas analysis (ABL30, Radiometer, Copenhagen, Denmark) and pre-ductal transcutaneous oxymoglobin saturation.

Left ventricular output and the proportion of left-to-right to right-to-left shunting through the ductus arteriosus was detected using pulsed Doppler ultrasound as described previously [16]. The ductal shunt was calculated as a DA ratio (time left to right/total shunt time). Spatially resolved spectroscopy (SRS, NIRO 200 Spectrophotometer; Hamamatsu Photonics K.K., Hamamatsu City, Japan) was employed for continuous recording of cerebral oxygenation expressed as a tissue oxygenation index (TOI, %) at 6 Hz. The NIRO 200 also provides continuous measurements of changes in concentrations ( $\mu$ Molar.cm) of oxyhemoglobin ( $\Delta$ HbO), deoxyhemoglobin ( $\Delta$ HHb) and total haemoglobin ( $\Delta$ HbT =  $\Delta$ HbO +  $\Delta$ HHb). Two aligned photodetectors are housed in the detection probe which is spaced 4 cm from the emission probe, with both the emission and detection probes placed over the fronto-parietal region and covered with light-proof dressing, as described previously [28]. Changes in Cerebral Blood Volume ( $\Delta$ CBV, ml/100 g) were calculated from measurements of the  $\Delta$ HbT, using a differential path-length factor of 4.99 [28,29] and formula as shown below [30].

### Calculations

Dynamic compliance ( $C_{dyn}$ ), adjusted for weight, was calculated as  $V_T$ /kg/(PIP - PEEP). Ventilatory efficiency index (VEI) was determined as  $3800/(\Delta P \cdot f \cdot PaCO_2)$  where 3800 is a constant for the production of carbon dioxide (mL·mmHg·kg<sup>-1</sup>·min<sup>-1</sup>),  $\Delta P$  = PIP - PEEP and  $f$  is the respiratory frequency [31]. Arterial oxygenation was described using the alveolar-arterial difference in oxygen (AaDO<sub>2</sub>) [32]. Oxygenation Index was calculated as  $OI = (F_iO_2 \cdot \text{mean airway pressure})/PaO_2 \cdot \Delta CBV = (\Delta HbT \cdot$

$MW_{\text{hemoglobin}} \cdot 10^{-6} / (t\text{Hb} \cdot 10^{-2} \cdot \text{CLVHR} \cdot \text{Dt} \cdot 10)$  where  $MW_{\text{hemoglobin}}$  = molecular weight of hemoglobin = 64,500,  $t\text{Hb}$  = concentration of hemoglobin in large vessels in  $\text{g} \cdot 100 \text{ mL}^{-1}$ ,  $\text{CLVHR}$  = cerebral to large vessel hematocrit ratio = 0.69, and  $\text{Dt}$  = brain tissue density in  $\text{g} \cdot \text{mL}^{-1} = 1.05$ .

### Lung and Brain Collection and Processing

At the conclusion of the ventilatory protocol, lambs were humanely killed, weighed and the lungs and brains collected. All histological and molecular assessments of resuscitated lambs were compared to UVC to determine the comparative effects of different resuscitation strategies on lung and brain inflammation and injury.

The lung was removed and sections of the right lower lobe were snap-frozen in liquid nitrogen for subsequent measurement of interleukin (IL)-1 $\beta$ , IL-6 and IL-8 mRNA expression using quantitative RT-PCR [33].

The brain was removed and sectioned as described previously [34]. The left hemisphere was sectioned into approximately 4-mm slices, and fixed in 4% paraformaldehyde for histological and immunohistochemical analyses. Serial sections (10  $\mu\text{m}$ ) at the level of the lateral ventricle were stained with: hemotoxylin and eosin (H&E) for gross assessment of brain pathology. Immunohistochemistry was used to assess: the presence of inflammatory cells using peroxidase-labeled lectin (1:200, Sigma, USA); lipid peroxidation (4-Hydroxynonenal; 4HNE, 1:1000, Calbiochem, USA); and blood brain barrier integrity (serum albumin, 1:1000, Accurate Chemical & Scientific Corporation, USA). Lectin- and 4HNE-positive cells were counted in four random non-overlapping high-powered fields in subcortical and periventricular white matter by a blinded assessor and expressed as number of positive cells/ $\text{mm}^2$  (ImageJ; NIH image, Bethesda, Maryland, USA). H&E and albumin analysis was conducted using six random high-powered fields per section, 2 sections per lamb, from the deep periventricular or subcortical white matter (DP2-BSW, Olympus, Japan). For H&E sections, each field was designated a qualitative score for the assessment of brain injury, where 0 = none, 1 = mild (<50% of the field of view occupied by brain damage), 2 = severe (>50% of the field of view occupied by brain damage). Albumin extravasation was determined by the presence or absence of albumin within the tissue surrounding blood vessels; only the incidence was noted.

### Statistical Analysis

Data are presented as mean  $\pm$  SEM. Serial data were compared between groups using two-way ANOVA with repeated measures (Sigmastat v3.0, SPSS Inc.). The first 15 minutes was analysed separated as above. Posthoc comparisons were performed using the Holm-Sidak method. ANOVA was used to compare biochemical and histologic indices of injury. Statistical significance was accepted for  $p < 0.05$ .

### Results

Umbilical arterial blood gas and acid/base status at birth were normal for all lambs and not different between groups (Mean for all groups: pH:  $7.19 \pm 0.05$  PaCO<sub>2</sub>:  $67.0 \pm 5.8$  mmHg; PaO<sub>2</sub>:  $28.8 \pm 5.1$  mmHg; SaO<sub>2</sub>:  $60.3 \pm 8.7\%$ ). Lamb body weights were not different between groups (UVC:  $2.9 \pm 0.2$  kg; Prot V<sub>T</sub>:  $3.2 \pm 0.2$  kg; High V<sub>T</sub>:  $3.1 \pm 0.2$  kg;  $p = 0.608$ ).

### Ventilation and Oxygenation

Peak inspiratory pressure was higher in the High V<sub>T</sub> group during the initial 15 min resuscitation period, as expected, and

remained higher for the subsequent 75 min ventilation period ( $p = 0.002$ ; Figure 1A) compared to the Prot V<sub>T</sub> group. The mean tidal volume obtained in the High V<sub>T</sub> group in the first 15 minutes was  $12.5 \pm 0.3$  mL/kg (Range 10.9–13.4 mL/kg) while in the Prot V<sub>T</sub> group it was  $7.0 \pm 0.2$  (Range 6.7–7.2 mL/kg;  $p < 0.001$ ; Figure 1B). V<sub>T</sub> was not different after the initial 15 minutes. Lung static compliance was lower (worse) in High V<sub>T</sub> lambs from 30 min ( $p < 0.001$ ; Figure 1C), while required FiO<sub>2</sub> was higher in High V<sub>T</sub> lambs throughout the ventilation procedure ( $p = 0.028$ ; Figure 1D). Calculated airway resistance was significantly higher in High V<sub>T</sub> lambs compared to Prot V<sub>T</sub> group lambs (High V<sub>T</sub>:  $82.1 \pm 4.9$ , Prot V<sub>T</sub>:  $48.7 \pm 5.4$ ;  $p = 0.002$ ).

The partial pressure of arterial oxygen (PaO<sub>2</sub>) was higher at 10 and 15 min in High V<sub>T</sub> lambs but variability precluded significance ( $p = 0.266$ ; Figure 2A). PaCO<sub>2</sub> was significantly lower in High V<sub>T</sub> lambs during the 15 min resuscitation period ( $p < 0.001$ ; Figure 2B), but was not different thereafter. Oxygenation Index was higher ( $p = 0.003$ ; Figure 2C) and the alveolar-arterial difference in oxygen was lower ( $p = 0.039$ ; Figure 2D) throughout resuscitation and ventilation in High V<sub>T</sub> lambs, indicative of poorer oxygenation. Arterial oxygen saturation was successfully maintained in both groups (High V<sub>T</sub>:  $87.1 \pm 2.8\%$ , Prot V<sub>T</sub>:  $88.1 \pm 2.9\%$ ) and was not different between groups ( $p = 0.393$ ). Calculated cerebral oxygen delivery was not different between groups at any of the blood-gas time points ( $p = 0.840$ ). Body temperature ( $p = 0.784$ ), blood lactate ( $p = 0.893$ ) or blood glucose ( $p = 0.435$ ) were not different between groups (data not shown).

### Hemodynamics

Combined left and right CaBF were significantly higher within the first 10 min in High V<sub>T</sub> lambs compared with Prot V<sub>T</sub> lambs (Fig 3 A & B). The coefficient of variation in total CaBF was significantly higher in High V<sub>T</sub> lambs compared to Prot V<sub>T</sub> (mean: High V<sub>T</sub>:  $0.60 \pm 0.06$  vs. Prot V<sub>T</sub>:  $0.38 \pm 0.05$ ;  $p < 0.01$ ); the majority of the variability was observed within the first 15 min. Maximum CaBF ( $p < 0.001$ ) and the amplitude of CaBF ( $p = 0.002$ ) was significantly higher within the first 15 min in High V<sub>T</sub> lambs compared to Prot V<sub>T</sub>. Mean arterial pressure was significantly higher in High V<sub>T</sub> lambs between 10–15 min and at 60 min compared to Prot V<sub>T</sub> lambs (Fig 3C). Left ventricular output ( $p = 0.57$ ), heart rate ( $p = 0.14$ ) and DA Ratio ( $p = 0.28$ ) were not different between groups. LVO and heart rate decreased similarly in both groups over time ( $p < 0.001$ ).

### SRS-NIRS

NIRS data was successfully obtained from 4 Prot V<sub>T</sub> and 6 High V<sub>T</sub> lambs. Averaged Tissue Oxygenation Index (Figure 4A & B) was not different between groups, but TOI variations between and within individual lambs were much greater in the High V<sub>T</sub> group. Changes in cerebral blood volume from baseline measurements was significantly lower in High V<sub>T</sub> lambs compared to Prot V<sub>T</sub> lambs from 60 min ( $p < 0.001$ ; Figure 4C & D). The Prot V<sub>T</sub> group showed a significant fall in CBV from baseline ( $p < 0.001$ ), while the high V<sub>T</sub> group remained unchanged.

### Inflammation and Oxidative Injury

Lung mRNA cytokine expression of IL-1 $\beta$ , IL-6 and IL-8 was significantly elevated in High V<sub>T</sub> lambs compared to Prot V<sub>T</sub> lambs and UVC (Fig 5). Within the subcortical white matter of the brain, the number of lectin-positive cells was significantly higher in the High V<sub>T</sub> group compared to UVC ( $p = 0.014$ ; Table 1). The Prot V<sub>T</sub> group was not different to UVC ( $p = 0.072$ ). There were no differences observed in the periventricular white matter

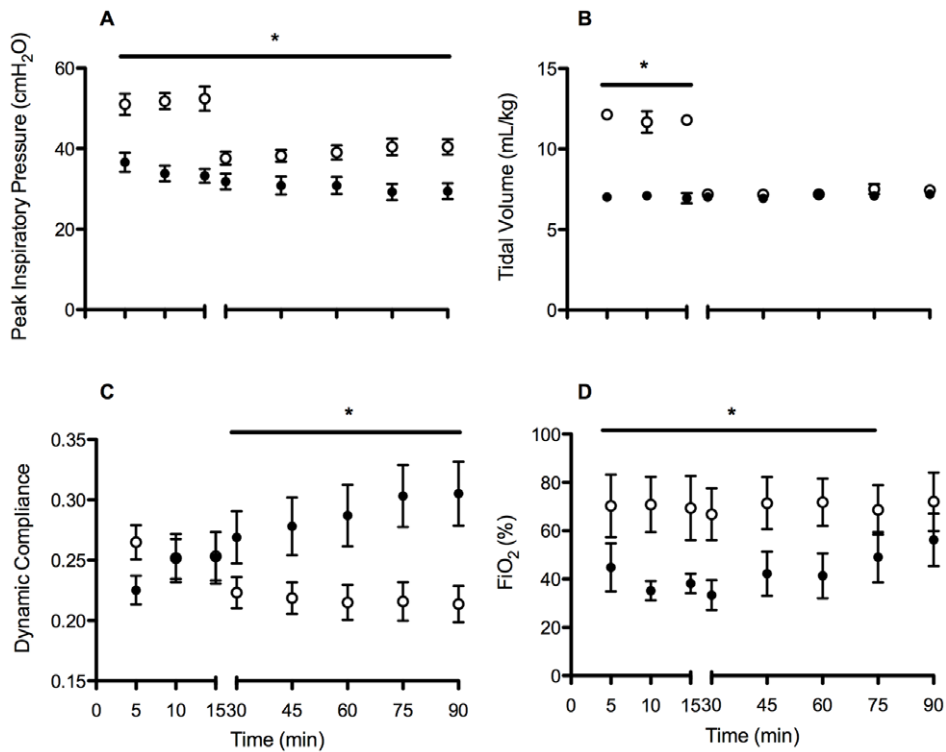

**Figure 1. Peak inspiratory pressure (A), tidal volume (B), dynamic compliance (C) and the fraction of inspired oxygen (FiO<sub>2</sub>; D) in High  $V_T$  (open circles) and Prot  $V_T$  (closed circles) lambs. \* $p < 0.05$  High  $V_T$  vs. Prot  $V_T$ .**  
doi:10.1371/journal.pone.0039535.g001

between the groups ( $p = 0.271$ ). The number of 4HNE-positive cells, indicative of oxidative injury, was significantly higher in High  $V_T$  lambs within the periventricular white matter compared to

UVC ( $p < 0.001$ ) and showed a strong trend to be greater than Prot  $V_T$  lambs ( $p = 0.054$ ). There was no difference observed in the subcortical white matter ( $p = 0.13$ ; Table 1).

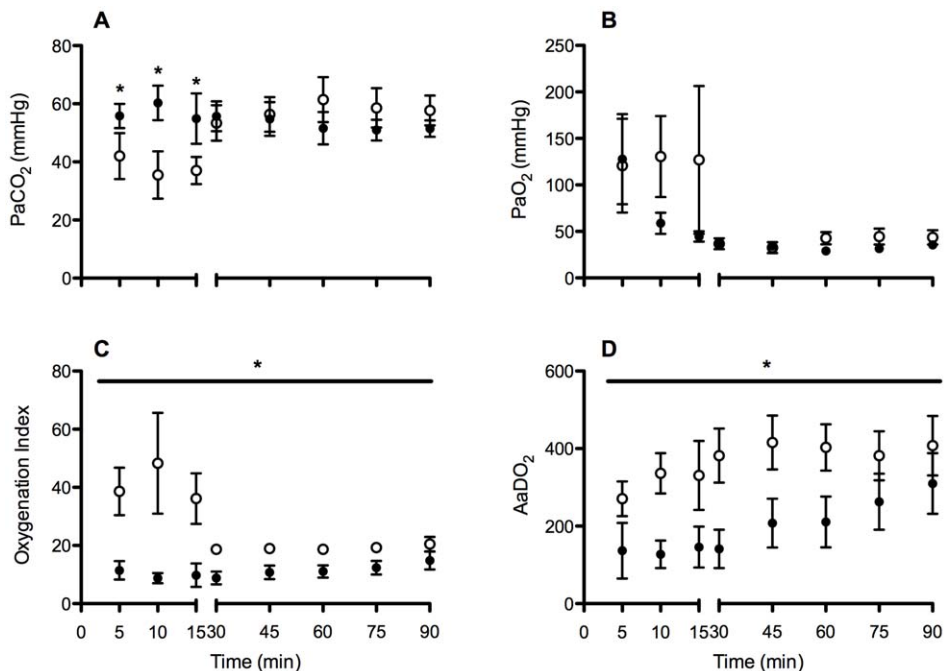

**Figure 2. The partial pressure of arterial (Pa) carbon dioxide (CO<sub>2</sub>; A), oxygen (O<sub>2</sub>; B), oxygenation index (C) and the alveolar-arterial difference in oxygen (AaDO<sub>2</sub>; D) in High  $V_T$  (open circles) and Prot  $V_T$  (closed circles) lambs. \* $p < 0.05$  High  $V_T$  vs. Prot  $V_T$ .**  
doi:10.1371/journal.pone.0039535.g002

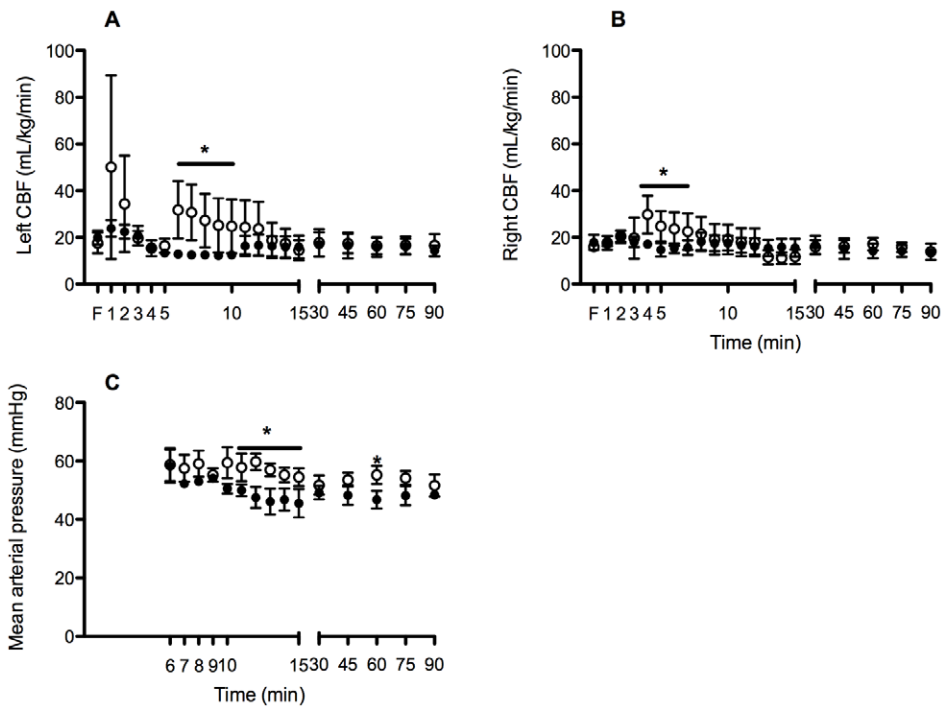

**Figure 3.** Left (A) and right (B) carotid blood flow (CABF) and mean arterial pressure (C) in High  $V_T$  (open circles) and Prot  $V_T$  (closed circles) lambs. \* $p < 0.05$  High  $V_T$  vs. Prot  $V_T$ . doi:10.1371/journal.pone.0039535.g003

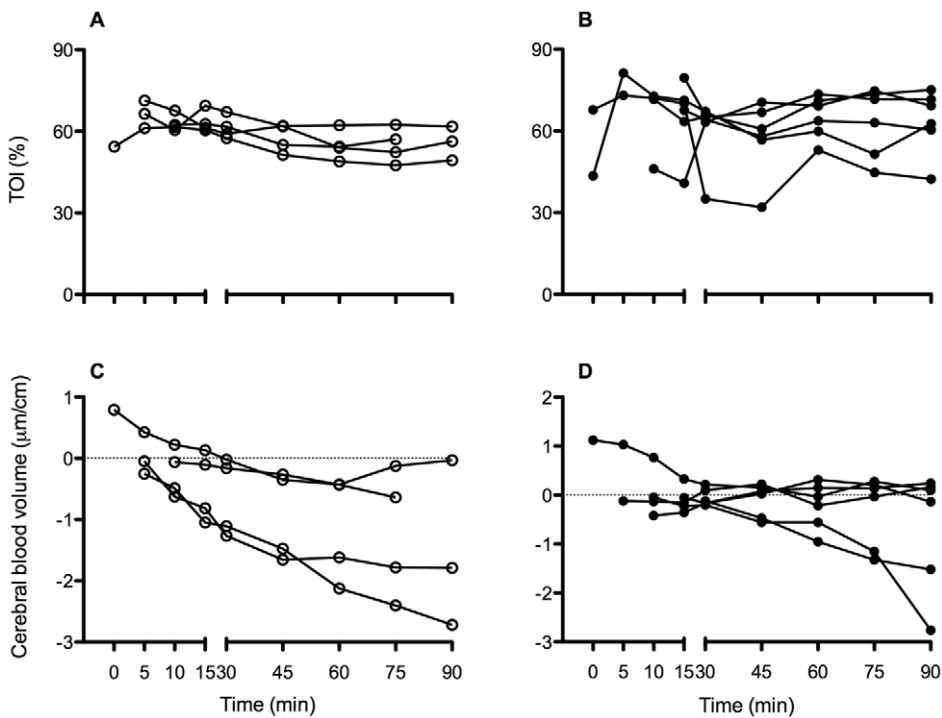

**Figure 4.** Tissue oxygenation index (TOI; A & B) and cerebral blood volume (C & D) in High  $V_T$  (open circles) and Prot  $V_T$  (closed circles) lambs. Values are derived using spatially resolved near infrared spectroscopy. Note the greater variability in TOI within the first 15 min during High  $V_T$  lambs (B) compared to Prot  $V_T$ . Cerebral vascular vasoparalysis is evident in 4 of 5 High  $V_T$  lambs by the maintenance of near stable cerebral blood volume (D). doi:10.1371/journal.pone.0039535.g004

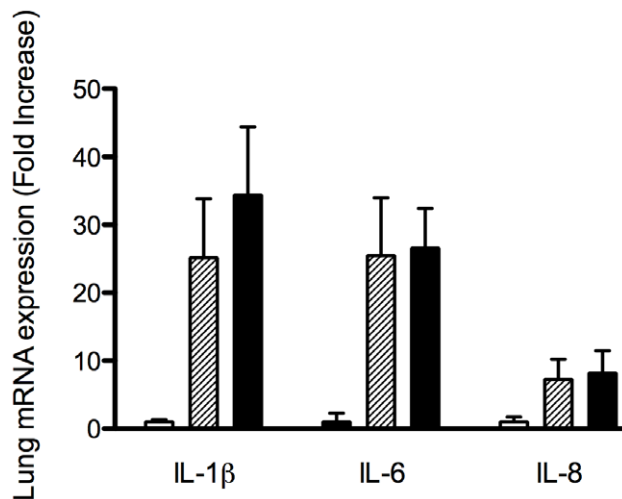

**Figure 5. Lung pro-inflammatory mRNA cytokine expression of interleukin (IL)-1 $\beta$ , IL-6 and IL-8 in unventilated controls (open bars), Prot V<sub>T</sub> (shaded bars) and High V<sub>T</sub> (black bars) lambs.** Values are expressed relative to UVC. Resuscitation, irrespective of the strategy, increased lung inflammation. \* $p < 0.05$  vs UVC. doi:10.1371/journal.pone.0039535.g005

### Brain Pathology and Hemorrhage

The incidence and severity of gross anatomical brain injury within the subcortical and periventricular white matter was higher in resuscitation groups compared to UVC, but no difference was observed between resuscitation groups receiving High V<sub>T</sub> compared to Prot V<sub>T</sub> (Table 1). The incidence of vascular extravasation, as evidenced by protein leakage, was evident in 60% of High V<sub>T</sub> lambs, but was not observed in Prot V<sub>T</sub> or UVC ( $p = 0.030$ ; Table 1).

### Discussion

Our previous studies suggest that the initial 15 minutes of resuscitation after birth may be a critical time period for the development of brain inflammation and injury in preterm infants

[20]. The findings of our current study are consistent with this contention and further demonstrate that the ventilation strategy used in this critical time period after birth can adversely affect the developing brain. Importantly, the use of high tidal volumes for resuscitation alters cerebral haemodynamics, increases brain inflammation, oxidative stress and vascular extravasation compared to a Prot V<sub>T</sub> protective resuscitation protocol.

Although preterm infants can be inadvertently exposed to high V<sub>T</sub> during the initial resuscitation in the delivery room [5,6] that can result in lung inflammation and injury [8,9,11,14], the consequences for the brain have not been investigated. The principal pathogenic factors causing neonatal preterm brain injury are infection/inflammation (both ante- and post-natal) and disturbed cerebral blood flow [2,3,4]. These factors can occur from aggressive resuscitation of preterm neonates [14,20], which can also adversely affect and destabilize cardiac function leading to a much greater risk of cerebral vascular injury.

In the Prot V<sub>T</sub> group we aimed to achieve stable arterial blood gas levels and to avoid large fluctuations in intra-thoracic pressure that disturb cardiac function. We subsequently showed that cerebral oxygenation was also relatively stable and that CBV gradually reduced in all Prot V<sub>T</sub> lambs. The normal postnatal reduction in cerebral blood volume and cerebral blood flow is a well-established and described phenomenon in both animals [35] and humans at term [36,37] and preterm [38]. It results from the normal postnatal increase in oxygen content and demonstrates the importance of oxygen delivery in regulating CBF [39]. In contrast, lambs subjected to High V<sub>T</sub> resuscitation failed to display a decrease in CBV, despite similar or higher (first 15 min) blood oxygenation levels, suggesting that the normal postnatal adaptation of the cerebral circulation has been altered in these lambs. Furthermore, as these lambs also had lower PaCO<sub>2</sub> levels during the 1<sup>st</sup> 15 min, we would expect this to enhance the cerebrovasoconstriction caused by increased oxygenation, providing further evidence that the cerebral vascular response was abnormal in High V<sub>T</sub> lambs. It is possible that this reflects injury to the cerebral vessels and likely contributed to the vascular leakage observed in the High V<sub>T</sub> group, particularly as relative cerebral hyperemia and cerebral vasoparalysis are known features in neonatal brain injury [40,41]. Our data on the carotid blood flow variations also

**Table 1. Assessment of brain injury.**

| Group                                                 | UVC (n = 6) |      |        | Prot V <sub>T</sub> (n = 5) |      |        | High V <sub>T</sub> (n = 5) |      |        |
|-------------------------------------------------------|-------------|------|--------|-----------------------------|------|--------|-----------------------------|------|--------|
|                                                       | Incidence   | Mild | Severe | Incidence                   | Mild | Severe | Incidence                   | Mild | Severe |
| <b>Gross Anatomical Injury</b>                        |             |      |        |                             |      |        |                             |      |        |
| Periventricular white matter                          | 0           | 0    | 0      | 40                          | 20   | 20     | 20                          | 20   | 0      |
| Subcortical white matter                              | 12          | 0    | 12     | 40                          | 40   | 40     | 40                          | 20   | 20     |
| <b>Lipid Peroxidation</b>                             |             |      |        |                             |      |        |                             |      |        |
| Periventricular white matter (cells/mm <sup>2</sup> ) | 245 ± 99    |      |        | 412 ± 41                    |      |        | 580 ± 60*#                  |      |        |
| Subcortical white matter (cells/mm <sup>2</sup> )     | 271 ± 73    |      |        | 393 ± 38                    |      |        | 402 ± 39                    |      |        |
| <b>Vascular protein extravasation</b>                 |             |      |        |                             |      |        |                             |      |        |
| Periventricular & subcortical white matter (%)        | 0           |      |        | 0                           |      |        | 60*#                        |      |        |
| <b>Infiltrating inflammatory cells</b>                |             |      |        |                             |      |        |                             |      |        |
| Periventricular white matter (cells/mm <sup>2</sup> ) | 120 ± 37    |      |        | 205 ± 26                    |      |        | 211 ± 65                    |      |        |
| Subcortical white matter (cells/mm <sup>2</sup> )     | 196 ± 58    |      |        | 536 ± 40                    |      |        | 728 ± 242*                  |      |        |

Incidence and severity of gross anatomical brain injury expressed as % of the lambs displaying evidence of mild or severe injury. \*indicates significant difference between High V<sub>T</sub> and UVC. #indicates significant difference between High V<sub>T</sub> and Prot V<sub>T</sub>. doi:10.1371/journal.pone.0039535.t001

support the findings of IVH in 21 of 23 infants in which fluctuations in cerebral blood flow velocity (measured by Doppler ultrasound) were detected [42]. Coupled with our previous study [20], our findings show that cerebral haemodynamics during the immediate newborn period is critically dependent upon pulmonary blood flow and LVO, which in turn, are critically dependent on resuscitation strategy.

Our study highlights the ability to detect some aspects of brain injury, including inflammation, oxidative stress and microscopic hemorrhage in brains within 90 minutes after the onset of resuscitation/ventilation at birth. This has not been previously reported, with most commentaries indicating that it takes 24 to 48 hours before brain pathologies can be detected. In the clinical setting, most cerebral ultrasounds are performed more than 24 hours after birth, with MRI studies conducted much later, and only if the baby can be moved. The study protocol allowed us to determine the effects of the initial resuscitation strategy, without the confounding influences of prolonged maintenance of respiratory and life support and other postnatal influences including nutrition and sepsis.

To assess how High  $V_T$  resuscitation impacts the immature brain, we compared these lambs with lambs resuscitated with a strategy we considered to be less injurious (Prot  $V_T$ ) and to minimally interfere with the cardiovascular transition at birth. The Prot  $V_T$  group received prophylactic surfactant, a 20 second sustained inflation followed by volume guarantee ventilation at 7 mL/kg, representing the normal spontaneous tidal volume of preterm lambs [15]. We have previously shown that an initial sustained inflation (20 s) can fully aerate the lung before the onset of tidal breathing [24], thereby facilitating a smooth pulmonary blood flow transition immediately after birth [24], decreases early markers of lung injury and inflammation [25] and improves CaBF stability compared to controls [26]. Further, prophylactic surfactant administration decreases markers of lung inflammation caused by high tidal volumes at birth [27] and markedly improves the uniformity of lung aeration [43]. While resuscitation in both groups increased indices of brain injury, inflammation and oxidative stress, the Prot  $V_T$  group displayed normal postnatal adaptive changes within the cerebral circulation and had reduced brain inflammation compared to the more injurious group. This suggests that improved resuscitation procedures, including appropriate lung recruitment and minimizing lung injury, may reduce the risk and severity of brain injury.

This study confirms that resuscitation with high  $V_T$  for 15 min initiates a pulmonary inflammatory response [10,12,44] which increases systemic proinflammatory cytokine mRNA expression [13,14,15]. One of the major up-stream mechanisms of brain injury, particularly pertaining to cerebral white matter injury of prematurity, is inflammation/infection, mediated by a systemic up-regulation of inflammatory cytokines [3]. While most of the research on the role of pro-inflammatory cytokines in white matter injury has focused on intrauterine inflammation or postnatal

sepsis, our previous work suggests there may be a contribution from resuscitation [20]. In this study, 15 min of high  $V_T$  resuscitation increased biomarkers of inflammation within the lung and brain compared to the Prot  $V_T$  group. Up-regulation of systemic pro-inflammatory cytokines (IL-1 $\beta$ , IL-6 and TNF- $\alpha$ ) are known to compromise integrity of the blood brain barrier and neuro-vascular circulation [45]. We observed protein extravasation in 60% of high  $V_T$  lambs, which was not present in unventilated control or Prot  $V_T$  lambs, confirming a strong association between increased systemic cytokines levels and blood brain barrier integrity.

Oxidative stress is another notable mechanism implicated in white matter injury, such as periventricular leukomalacia (PVL) [3]. The neuroglial oligodendrocyte cells function to myelinate developing axons and their precursors are exquisitely sensitive to oxidative injury [46]. Thus, oxidative injury impairs myelination, which is an important pathological feature of PVL. Clinical studies have found increased lipid peroxidation in cases of PVL [47]. Our study showed that high  $V_T$  lambs had elevated cellular lipid peroxidation within the periventricular white matter, potentially resulting in increased white matter injury within this group. The findings of increased brain inflammation and oxidative stress resulting from resuscitation, and particularly high  $V_T$  resuscitation, indicates that the immediate resuscitation period in the delivery room is likely a critical window for the development of white matter injury.

In summary, this study has shown that resuscitation increases brain inflammation and oxidative stress, but an initial high  $V_T$  resuscitation strategy further exacerbated cerebral hemodynamic instability, brain inflammation and injury. This study highlights the critical role that the initial respiratory support has on the development of brain inflammation and injury, and the requirement for better monitoring of delivered tidal volumes to preterm infants in the delivery room. It also demonstrates that brain injury can be seen within 90 minutes of the onset of an injurious stimulus, and the severity of brain injury can be reduced by protective resuscitation strategies in the delivery room.

## Acknowledgments

We especially thank Chiesi Farmaceutica for the donation of surfactant used in this study. The authors gratefully acknowledge the expert technical assistance of Alison Moxham, Valerie Zahra, Robert Galinsky, Kristina Sobotka and Karyn Rodgers.

## Author Contributions

Conceived and designed the experiments: GP SM FW AG TM MK SH. Performed the experiments: GP SM SB AB FW JA AG TM MT MK SH. Analyzed the data: GP SM SB AB FW JA MT. Contributed reagents/materials/analysis tools: GP SM SB AB FW JA MT. Wrote the paper: GP SM SB AB FW JA AG TM MT MK SH.

## References

- Volpe JJ (1998) Brain injury in the premature infant: overview of clinical aspects, neuropathology, and pathogenesis. *Semin Pediatr Neurol* 5: 135–151.
- Del Toro J, Louis PT, Goddard-Finegold J (1991) Cerebrovascular regulation and neonatal brain injury. *Pediatr Neurol* 7: 3–12.
- Khawaja O, Volpe JJ (2008) Pathogenesis of cerebral white matter injury of prematurity. *Arch Dis Child Fetal Neonatal Ed* 93: F153–161.
- Lou HC, Lassen NA, Friis-Hansen B (1979) Impaired autoregulation of cerebral blood flow in the distressed newborn infant. *J Pediatr* 94: 118–121.
- Schmolzer GM, Kamlin OC, O'Donnell CP, Dawson JA, Morley CJ, et al. (2010) Assessment of tidal volume and gas leak during mask ventilation of preterm infants in the delivery room. *Arch Dis Child Fetal Neonatal Ed* 95: F393–397.
- Poulton DA, Schmolzer GM, Morley CJ, Davis PG (2011) Assessment of chest rise during mask ventilation of preterm infants in the delivery room. *Resuscitation* 82: 175–179.
- Schmolzer GM, Te Pas AB, Davis PG, Morley CJ (2008) Reducing lung injury during neonatal resuscitation of preterm infants. *J Pediatr* 153: 741–745.
- Jobe AH, Hillman N, Polglase G, Kramer BW, Kallapur S, et al. (2008) Injury and inflammation from resuscitation of the preterm infant. *Neonatology* 94: 190–196.
- Bjorklund LJ, Ingimarsson J, Curstedt T, John J, Robertson B, et al. (1997) Manual ventilation with a few large breaths at birth compromises the therapeutic effect of subsequent surfactant replacement in immature lambs. *Pediatr Res* 42: 348–355.



10. Polglase GR, Hillman NH, Pillow JJ, Nitsos I, Newnham JP, et al. (2010) Ventilation-mediated injury after preterm delivery of Ureaplasma parvum colonized fetal lambs. *Pediatr Res* 67: 630–635.
11. Hillman NH, Polglase GR, Jane Pillow J, Saito M, Kallapur SG, et al. (2011) Inflammation and lung maturation from stretch injury in preterm fetal sheep. *Am J Physiol Lung Cell Mol Physiol* 300: L232–241.
12. Polglase GR, Hillman NH, Pillow JJ, Cheah FC, Nitsos I, et al. (2008) Positive end-expiratory pressure and tidal volume during initial ventilation of preterm lambs. *Pediatr Res* 64: 517–522.
13. Chiumello D, Pristine G, Slutsky AS (1999) Mechanical ventilation affects local and systemic cytokines in an animal model of acute respiratory distress syndrome. *Am J Respir Crit Care Med* 160: 109–116.
14. Hillman NH, Moss TJ, Kallapur SG, Bachurski C, Pillow JJ, et al. (2007) Brief, large tidal volume ventilation initiates lung injury and a systemic response in fetal sheep. *Am J Respir Crit Care Med* 176: 575–581.
15. Polglase GR, Hillman NH, Ball MK, Kramer BW, Kallapur SG, et al. (2009) Lung and systemic inflammation in preterm lambs on continuous positive airway pressure or conventional ventilation. *Pediatr Res* 65: 67–71.
16. Polglase GR, Hooper SB, Gill AW, Allison BJ, McLean CJ, et al. (2009) Cardiovascular and pulmonary consequences of airway recruitment in preterm lambs. *J Appl Physiol* 106: 1347–1355.
17. de Waal KA, Evans N, Osborn DA, Kluckow M (2007) Cardiorespiratory effects of changes in end expiratory pressure in ventilated newborns. *Arch Dis Child Fetal Neonatal Ed* 92: F444–448.
18. Miletin J, Dempsey EM (2008) Low superior vena cava flow on day 1 and adverse outcome in the very low birthweight infant. *Arch Dis Child Fetal Neonatal Ed* 93: F368–371.
19. Kluckow M, Evans N (2000) Low superior vena cava flow and intraventricular haemorrhage in preterm infants. *Arch Dis Child Fetal Neonatal Ed* 82: F188–194.
20. Polglase GR, Nitsos I, Baburamani AA, Crossley KJ, Slater MK, et al. (2012) Inflammation in utero exacerbates ventilation-induced brain injury in preterm lambs. *J Appl Physiol* 112: 481–489.
21. Rudolph AM (1977) Fetal and neonatal pulmonary circulation. *Am Rev Respir Dis* 115: 11–18.
22. van Bel F, Roman C, Klautz RJ, Teitel DF, Rudolph AM (1994) Relationship between brain blood flow and carotid arterial flow in the sheep fetus. *Pediatr Res* 35: 329–333.
23. Stenson BJ, Boyle DW, Szyld EG (2006) Initial ventilation strategies during newborn resuscitation. *Clin Perinatol* 33: 65–82, vi–vii.
24. te Pas AB, Siew M, Wallace MJ, Kitchen MJ, Fouras A, et al. (2009) Effect of sustained inflation length on establishing functional residual capacity at birth in ventilated premature rabbits. *Pediatr Res* 66: 295–300.
25. Wallace MJ, te Pas AB, Siew ML, Allison BJ, Zahra VA, et al. (2010) A Single Sustained Inflation at Birth Reduces Markers of Lung Injury in Preterm Rabbit Pups. *Pediatric Academic Society Annual Meeting Abstract* 4407.323: 222.
26. Sobotka KS, Hooper SB, Allison BJ, Te Pas AB, Davis PG, et al. (2011) An initial sustained inflation improves the respiratory and cardiovascular transition at birth in preterm lambs. *Pediatr Res* Accepted.
27. Hillman NH, Nitsos I, Berry C, Pillow JJ, Kallapur SG, et al. (2011) Positive end-expiratory pressure and surfactant decrease lung injury during initiation of ventilation in fetal sheep. *Am J Physiol Lung Cell Mol Physiol*.
28. Wong FY, Alexiou T, Samarasinghe T, Brodecky V, Walker AM (2010) Cerebral arterial and venous contributions to tissue oxygenation index measured using spatially resolved spectroscopy in newborn lambs. *Anesthesiology* 113: 1385–1391.
29. Duncan A, Meek JH, Clemence M, Elwell CE, Tysczuk L, et al. (1995) Optical pathlength measurements on adult head, calf and forearm and the head of the newborn infant using phase resolved optical spectroscopy. *Phys Med Biol* 40: 295–304.
30. Elwell C (1995) A practical user's guide to near infrared spectroscopy.; Elwell C, editor. Hamamatsu City, Japan: Hamamatsu Photonics KK.
31. Ikegami M, Kallapur SG, Jobe AH (2004) Initial responses to ventilation of premature lambs exposed to intra-amniotic endotoxin 4 days before delivery. *Am J Physiol Lung Cell Mol Physiol* 286: L573–579.
32. Polglase GR, Moss TJ, Nitsos I, Allison BJ, Pillow JJ, et al. (2008) Differential effect of recruitment maneuvers on pulmonary blood flow and oxygenation during HFOV in preterm lambs. *J Appl Physiol* 105: 603–610.
33. Kallapur SG, Willet KE, Jobe AH, Ikegami M, Bachurski CJ (2001) Intra-amniotic endotoxin: chorioamnionitis precedes lung maturation in preterm lambs. *Am J Physiol Lung Cell Mol Physiol* 280: L527–536.
34. Polglase GR, Hooper SB, Kluckow M, Gill AW, Harding R, et al. (2012) Cardiopulmonary hemodynamics in lambs after preterm birth: are they influenced by sex? *Reprod Fertil Dev* 24: 510–516.
35. Richardson BS, Carmichael L, Homan J, Gagnon R (1989) Cerebral oxidative metabolism in lambs during perinatal period: relationship to electrocortical state. *Am J Physiol* 257: R1251–1257.
36. Hayashi T, Ichiyama T, Uchida M, Tashiro N, Tanaka H (1992) Evaluation by colour Doppler and pulsed Doppler sonography of blood flow velocities in intracranial arteries during the early neonatal period. *Eur J Pediatr* 151: 461–465.
37. Dani C, Pezzati M, Martelli E, Prussi C, Bertini G, et al. (2002) Effect of blood transfusions on cerebral haemodynamics in preterm infants. *Acta Paediatr* 91: 938–941.
38. Winberg P, Sonesson SE, Lundell BP (1990) Postnatal changes in intracranial blood flow velocity in preterm infants. *Acta Paediatr Scand* 79: 1150–1155.
39. Gleason CA, Jones MD, Jr., Traystman RJ, Notter RH (1988) Fetal cerebral responses to ventilation and oxygenation in utero. *Am J Physiol* 255: R1049–1054.
40. Rosenbaum JL, Almlí CR, Yundt KD, Altman DI, Powers WJ (1997) Higher neonatal cerebral blood flow correlates with worse childhood neurologic outcome. *Neurology* 49: 1035–1041.
41. Meek JH, Elwell CE, McCormick DC, Edwards AD, Townsend JP, et al. (1999) Abnormal cerebral haemodynamics in perinatally asphyxiated neonates related to outcome. *Arch Dis Child Fetal Neonatal Ed* 81: F110–115.
42. Perlman JM, McMenamin JB, Volpe JJ (1983) Fluctuating cerebral blood-flow velocity in respiratory-distress syndrome. Relation to the development of intraventricular hemorrhage. *N Engl J Med* 309: 204–209.
43. Siew ML, Te Pas AB, Wallace MJ, Kitchen MJ, Islam MS, et al. (2011) Surfactant increases the uniformity of lung aeration at birth in ventilated preterm rabbits. *Pediatr Res* 70: 50–55.
44. Hillman NH, Kallapur SG, Pillow JJ, Moss TJ, Polglase GR, et al. (2010) Airway Injury from Initiating Ventilation in Preterm Sheep. *Pediatr Res* 67: 60–65.
45. Yanowitz TD, Jordan JA, Gilmour CH, Towbin R, Bowen A, et al. (2002) Hemodynamic disturbances in premature infants born after chorioamnionitis: association with cord blood cytokine concentrations. *Pediatr Res* 51: 310–316.
46. Back SA, Luo NL, Borenstein NS, Levine JM, Volpe JJ, et al. (2001) Late oligodendrocyte progenitors coincide with the developmental window of vulnerability for human perinatal white matter injury. *J Neurosci* 21: 1302–1312.
47. Haynes RL, Folkert RD, Keefe RJ, Sung I, Swzeda LI, et al. (2003) Nitrosative and oxidative injury to premyelinating oligodendrocytes in periventricular leukomalacia. *J Neuropathol Exp Neurol* 62: 441–450.
